# Supplementary material for: Motor and Cognitive Performance in Patients with Liver Cirrhosis with Minimal Hepatic Encephalopathy
Source: PubMed Central journal article supplement (PMC7408738; doi:10.3390/jcm9072154), 2020-07-08
Supplement: jcm-09-02154-s001.pdf [file jcm-09-02154-s001.pdf]

## SUPPLEMENTARY MATERIAL

# Motor and cognitive performance in patients with liver cirrhosis with minimal hepatic encephalopathy

Constanza San Martín-Valenzuela, Aroa Borrás-Barrachina, Juan-José Gallego, Amparo Urios, Víctor Mestre-Salvador, Patricia Correa-Ghisays, María-Pilar Ballester, Desamparados Escudero-García, Joan Tosca, Cristina Montón, María-Pilar Ríos, Elena Kosenko, Vicente Felipo, Rafael Tabares-Seisdedos, Gabriel Selva-Vera\* and Carmina Montoliu\*

### Contents:

- **Figure S1.** Balance assessment
- **Figure S2.** Grip strength
- **Table S1.** Pairwise comparison between participants with alcoholic etiology of cirrhosis and participants with other diseases

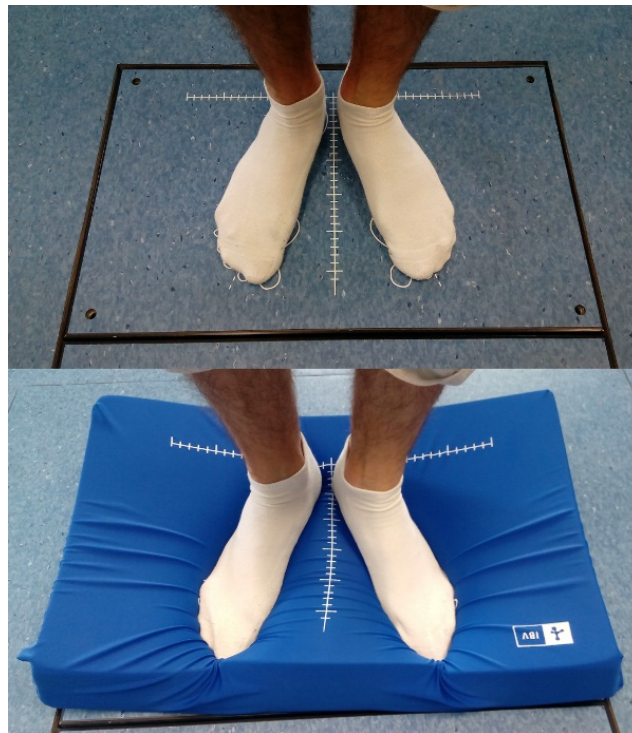

**Figure S1.** Balance assessment. A dynamometric platform is shown, with markings to ensure a standardized test (subject in bipedal position with feet together slightly open at a 45° angle without footwear). Four Romberg trials were measured under different stability conditions (eyes open or closed on a firm surface or with a 10 cm foam under the feet).

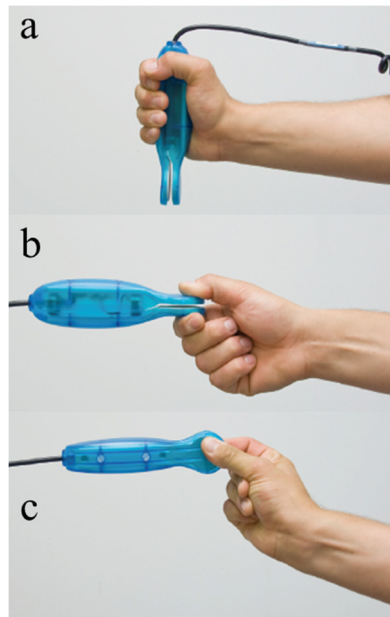

**Figure S2.** Grip strength. The hand strength was recorded for three functional positions during 30 s of force maintenance: a) handgrip, b) lateral pinch (thumb pad and lateral aspect of index finger), c) tip-pinch (thumb and index fingers).

**Table S1.** Pairwise comparison between participants with alcoholic etiology of cirrhosis and participants with other diseases

| Outcomes                                                       | (I)<br>Etiology | (J)<br>Etiology | Mean<br>differences | Typical<br>error | Statistical<br>sig. (p-<br>value) <sup>a</sup> | 95% confidence<br>interval for the<br>difference <sup>a</sup> |         |
|----------------------------------------------------------------|-----------------|-----------------|---------------------|------------------|------------------------------------------------|---------------------------------------------------------------|---------|
| Gait velocity                                                  | Alcohol         | Other           | ,048                | ,057             | ,407                                           | -,068                                                         | ,164    |
| Stance time                                                    | Alcohol         | Other           | -,002               | ,041             | ,964                                           | -,084                                                         | ,081    |
| Propulsive ground reaction<br>force                            | Alcohol         | Other           | 13,003              | 9,882            | ,196                                           | -6,969                                                        | 32,976  |
| Swept area                                                     | Alcohol         | Other           | 13,248              | 261,917          | ,960                                           | -516,107                                                      | 542,602 |
| Medio-lateral centre of<br>pressure displacement               | Alcohol         | Other           | 8,471               | 21,812           | ,700                                           | -35,613                                                       | 52,555  |
| Antero-posterior centre of<br>pressure displacement            | Alcohol         | Other           | 4,001               | 20,425           | ,846                                           | -37,279                                                       | 45,281  |
| Angle displacement                                             | Alcohol         | Other           | -6,831              | 25,620           | ,791                                           | -58,612                                                       | 44,950  |
| Hand strength coefficient of<br>variation, grip right          | Alcohol         | Other           | -,084               | 1,156            | ,942                                           | -2,421                                                        | 2,253   |
| Hand strength coefficient of<br>variation, grip left           | Alcohol         | Other           | -,179               | ,898             | ,843                                           | -1,993                                                        | 1,635   |
| Hand strength coefficient of<br>variation, right lateral pinch | Alcohol         | Other           | ,497                | ,958             | ,607                                           | -1,439                                                        | 2,433   |
| Hand strength coefficient of<br>variation, left lateral pinch  | Alcohol         | Other           | -,600               | 1,125            | ,597                                           | -2,873                                                        | 1,673   |
| Hand strength coefficient of<br>variation, right tip pinch     | Alcohol         | Other           | ,505                | 1,330            | ,706                                           | -2,183                                                        | 3,193   |
| Hand strength coefficient of<br>variation, left tip pinch      | Alcohol         | Other           | -,946               | 1,358            | ,490                                           | -3,690                                                        | 1,798   |
| Finger tapping test, left                                      | Alcohol         | Other           | -6,233              | 4,276            | ,153                                           | -14,875                                                       | 2,409   |
| Finger tapping test, right                                     | Alcohol         | Other           | -3,901              | 5,094            | ,448                                           | -14,196                                                       | 6,394   |
| Finger tapping test 2, left                                    | Alcohol         | Other           | -1,499              | 4,547            | ,743                                           | -10,689                                                       | 7,691   |
| Finger tapping test 2, right                                   | Alcohol         | Other           | -2,607              | 3,799            | ,497                                           | -10,286                                                       | 5,072   |

The table indicates the pairwise comparison of the one-way between-subject factor multivariate analysis of variance when participants are regrouped between those who have alcohol as the etiology of cirrhosis (alcohol) and those who have other pathology as the etiology of cirrhosis (Other). <sup>a</sup>Adjustment for multiple comparisons: Bonferroni.
